# A functional logic for neurotransmitter co-release in the cholinergic forebrain pathway

Aditya Nair<sup>1,4</sup>, Martin Graf<sup>1</sup>, Yue Yang Teo<sup>1,2</sup>, George J. Augustine<sup>1,3</sup>

<sup>1</sup>Lee Kong Chian School of Medicine, Nanyang Technological University

<sup>2</sup>National University of Singapore

<sup>3</sup>Institute of Molecular and Cellular Biology, Agency of Science, Technology and Research

<sup>4</sup>Current Address: Computation and Neural Systems, California Institute of Technology, Pasadena, CA, USA

Corresponding author: George Augustine

E-mail: [george.augustine@ntu.edu.sg](mailto:george.augustine@ntu.edu.sg)

Abstract: 66 words (70-word limit)

Main Text: 1565 (excluding refs) words (1500-word limit)

Keywords: cholinergic, claustrum, co-release, cell-type

Conflict of Interest: The authors declare no competing financial interests.

22 **Abstract**

23 The forebrain cholinergic system has recently been shown to co-release both  
24 acetylcholine and GABA. We have discovered that such co-release by cholinergic  
25 inputs to the claustrum differentially affects neurons that project to cortical versus  
26 subcortical targets. The resulting changes in neuronal gain toggles network  
27 efficiency and discriminability of output between two different projection subcircuits.  
28 Our results provide a potential logic for neurotransmitter co-release in cholinergic  
29 systems.

30

31

32

33

34

35

36

37

38

39

40 **Main Text**

41 The cholinergic system of the basal forebrain is a crucial pathway that modulates  
42 attention, arousal and learning<sup>1-3</sup>. Such actions arise from the ability of the  
43 cholinergic system to alter neuronal excitability and shape the correlational structure  
44 of neural populations<sup>4-6</sup>. The prevailing view that the cholinergic system implements  
45 such computations solely by releasing acetylcholine (ACh) has been challenged by  
46 the recent discovery that nearly all forebrain cholinergic neurons co-release the  
47 inhibitory transmitter, GABA, along with ACh<sup>7,8</sup>. While such co-release has been  
48 observed in multiple brain areas, a functional logic for it is missing: does co-release  
49 happen in a target-specific manner and how does it impact cholinergic computations?  
50 We have addressed these questions by analyzing cholinergic modulation of the  
51 claustrum. The claustrum receives input from basal forebrain cholinergic neurons<sup>11-</sup>  
52 <sup>13</sup> and has been implicated in attention, perhaps by altering cortical gain<sup>11,14</sup>.  
53 Cholinergic modulation of claustrum neurons was examined by whole-cell patch  
54 clamp recordings in brain slices from a ChAT-Cre mouse line crossed with another  
55 line with Cre-dependent expression of ChR2-YFP<sup>15</sup>, thereby targeting ChR2  
56 exclusively to cholinergic neurons. To isolate cholinergic responses, recordings  
57 were performed in the presence of a glutamate receptor blocker (kynurenic acid,  
58 KYN; 1  $\mu$ M) and GABA receptor blocker (Gabazine, GBZ; 10  $\mu$ M). The claustrum  
59 consists of multiple types of projection neurons and interneurons<sup>16</sup>. A trained  
60 classifier was applied to whole-cell patch clamp measurements of intrinsic electrical  
61 properties to identify neurons that project to cortical or non-cortical targets, as well  
62 as to identify the three known types of local interneurons<sup>16</sup>.

63 ChR2-mediated photostimulation of cholinergic input elicited responses in claustror-  
64 cortical (CC), claustror-subcortical (CS) projection neurons and VIP interneurons  
65 (VIP-IN; Fig 1a). Only a small fraction (5%,  $n = 5/97$  neurons) of CC neurons  
66 received cholinergic excitatory input, while five times more CS neurons (25%,  $n =$   
67  $16/64$  neurons) and even more VIP-IN (44%,  $n = 4/9$  neurons) received such  
68 excitation (Fig 1b, EPSC amplitude: CC:  $14 \pm 1.2$  pA, CS:  $35.3 \pm 5$  pA, VIP:  $64.7 \pm$   
69  $5.5$  pA). These were monosynaptic inputs, because they persisted after tetrodotoxin  
70 (TTX;  $1 \mu\text{M}$ ) was used to block action potentials and 4-AP was applied to enhance  
71 ChR2-mediated depolarization<sup>17-19</sup> (Fig 1c). These excitatory responses were  
72 mediated by nicotinic ACh receptors, because they were blocked by a nicotinic  
73 receptor blocker (mecamylamine, MECA;  $10 \mu\text{M}$ ; Fig 1c) and had reversal potentials  
74 near zero (Fig S1a), typical of responses mediated by nicotinic receptors<sup>20</sup>. SST and  
75 PV interneurons never responded to cholinergic photostimulation (Fig 1b). These  
76 results reveal cell-type specific modulation of claustrum neurons and are consistent  
77 with reports that VIP interneurons are a critical target for cholinergic modulation in  
78 other parts of the brain<sup>21,22</sup>.

79 Because the inhibitory neurotransmitter, GABA, can be co-released by cholinergic  
80 neurons<sup>7</sup>, we asked whether claustrum neurons receive GABAergic inhibition by  
81 photostimulating cholinergic neurons after blocking excitatory responses with KYN,  
82 MECA and atropine (ATR;  $10 \mu\text{M}$ ). Under such conditions, monosynaptic outward  
83 currents were observed (Fig 1d, IPSC amplitude:  $49.3 \pm 6.2$  pA), that persisted in  
84 the in the presence of TTX and 4-AP. These responses were mediated by GABA<sub>A</sub>  
85 receptors, because they were blocked by GBZ (Fig 1d) and were inhibitory because

86 their reversal potential of -70 mV was more negative than action potential threshold  
87 of CC neurons ( $-33.8 \pm 0.2$  mV, Fig S1b). Remarkably, we only found inhibitory  
88 inputs to CC neurons (Fig 1e). Indeed, CC neurons were much more likely to exhibit  
89 inhibitory responses to cholinergic input (21%,  $n = 6/28$  neurons) than excitatory  
90 responses (5%). These results reveal a logic for cholinergic co-release of GABA:  
91 while claustral neurons projecting to subcortical structures, as well as VIP-IN, are  
92 excited via cholinergic activation of nicotinic receptors, neurons projecting to cortical  
93 structures are more likely to be inhibited by co-released GABA. Such opposing  
94 regulation by cholinergic input may also be present in cortical circuits<sup>23</sup>.

95 To understand the functional consequences of the dual modulation produced by co-  
96 transmitter release, we determined the effects of cholinergic input on action  
97 potentials (APs) evoked by depolarizing current pulses using a 1-second long train  
98 of blue light (488 nm) pulses delivered at 10Hz. In CC neurons, cholinergic input  
99 reduced the frequency of APs evoked by a 100 pA depolarizing current pulse (Fig  
100 2a, left,  $n = 12$  neurons), presumably due to the inhibitory action of GABA. In contrast,  
101 this input increased AP firing in both CS neurons and VIP neurons, presumably due  
102 to ACh excitation (Fig 2b,c, left,  $n = 10$  CS neurons, 5 VIP-IN). The slope of the  
103 relationship between current magnitude and AP frequency, the input-output (IO)  
104 curve, reveals neuronal gain<sup>24</sup>; changes in gain are a characteristic feature of  
105 cholinergic modulation of the cortex<sup>25</sup>. While inhibitory input decreased the gain of  
106 CC neurons (Fig 2a, right), excitatory input increased the gain of CS neurons and  
107 VIP-IN (Fig 2b,c, right). Increased modulation of CS neuron gain was also  
108 accompanied by a secondary decrease in AP frequency at higher current intensities

109 (Fig 2b, right). Thus, the co-transmitters released by cholinergic input produces  
110 opposing, cell-type specific gain modulation of claustrum neurons (Fig 2d).

111 In the cortex, optogenetic activation of forebrain cholinergic input improves neuronal  
112 signal-to-noise ratio<sup>26</sup>. We used our results to predict how opposing cholinergic gain  
113 control alters this cholinergic computation by simulating how responses to weak ( $X_A$ )  
114 and strong ( $X_B$ ) inputs would be transformed by the empirically measured IO  
115 functions of single CC and CS neurons (Fig 3a). Such analyses have been used to  
116 demonstrate the ability of norepinephrine to alter neuronal signal-to-noise ratio<sup>27</sup>. In  
117 CC neurons, for two inputs centred around 100 and 200 pA (with noise of 100 pA;  
118 Fig. 3a1), cholinergic action (Fig. 3a2) improved the separation of output  
119 distributions ( $Y_{GA}$ ,  $Y_{GB}$ ; Gain modulated output distributions) compared to basal  
120 conditions ( $Y_A$ ,  $Y_B$ ) by 56% (Fig 3a3, 3a4). However, for CS neurons the situation  
121 was reversed (Fig 3b): cholinergic input reduced the separation of output  
122 distributions by 35% (Fig 3b3, 3b4). This simulation indicates that cholinergic input  
123 improves the signal-to-noise ratio for CC neurons while reducing it for CS neurons;  
124 thus, co-release of ACh and GABA acts as a toggle to switch both the gain (Fig 2)  
125 and the signal-to-noise ratio of these projection neuron subpopulations. This effect  
126 occurs across a wide range of inputs for both CC and CS neurons (Fig S2a, S2b).

127 Recent studies demonstrate that cholinergic input improves network encoding  
128 efficiency by altering the relationship between signal and noise correlations in the  
129 neuronal activity of cortical networks<sup>4,28</sup>. A strong relationship between these is  
130 harmful for encoding a given signal, because it reduces discrimination of this signal  
131 from noise; in the cortex, cholinergic input - as well as attention - weakens this

132 relationship<sup>4,29,30</sup>. We predicted the impact of cholinergic co-release on claustrum  
133 network correlation structure by using a recurrent circuit model based on an  
134 inhibition-stabilized network<sup>31</sup>. This model contained 300 neurons, including  
135 excitatory CC and CS projection neurons and the three inhibitory interneuron types;  
136 the IO function of each neuron type was defined by experimental measurements  
137 (See Methods, Fig S3). This network was driven by two types of stimuli similar to  
138 those previously applied *in vivo*<sup>4</sup>: (1) a signal with Gaussian amplitude distribution,  
139 with a SD of 1/10<sup>th</sup> of the mean; and (2) Poisson distributed noisy input with a SD is  
140 equal to its mean (Fig 3c). For both stimuli, we examined the impact of cholinergic  
141 input on signal correlations and noise correlations between neurons. Remarkably,  
142 changing neuronal gain, by replacing native IO functions with IO functions measured  
143 during cholinergic photostimulation, decreased the slope of the signal correlation–  
144 noise correlation plot for CS neurons across a range of signal input sizes above 140  
145 pA ( $\Delta Slope = -15\%$ , Fig 3d, Fig S2c), thus weakening the relationship between  
146 signal and noise correlations, as predicted from theory and *in vivo* experiments<sup>4,32</sup>.  
147 Because weakening this relationship leads to better signal discrimination, the  
148 reduction in correlation slope is associated with greater encoding capacity in  
149 networks<sup>4,29,32</sup>. In contrast, for CC neurons the slope increased for a range of signal  
150 input sizes above 140 pA<sup>4</sup> ( $\Delta Slope = +16\%$ , Fig 3e, Fig S2d), thus strengthening  
151 the relationship between signal and noise correlations and reducing the encoding  
152 capacity of this population. Hence, we also observe a toggle in encoding efficiency  
153 between the CC and CS populations.

154 For signal inputs smaller than 100 pA, we observed a toggle in the opposite direction,  
155 with efficiency increasing for CC neurons while decreasing for CS neurons (Fig S2  
156 c, S2d). Our model indicates that the opposing cholinergic effects on gain due to co-  
157 release of ACh and GABA toggles network encoding efficiency in an input-  
158 dependent manner between distinct subpopulations of projection neurons,  
159 increasing efficiency for one population while reducing it for the other (Fig 3f).

160 Cholinergic modulation has been investigated in diverse experimental paradigms.  
161 Our results connect these observations and provide a microcircuit basis for the  
162 cholinergic control of signal-to-noise ratio and encoding capacity, based on opposing  
163 gain control of specific cell types in the claustrum. Our results highlight that  
164 cholinergic modulation does not affect networks uniformly: instead, it toggles  
165 information between subpopulations, from a cortically projecting to a subcortically  
166 projecting population in an input-dependent manner in the case of the claustrum (Fig  
167 3f). This mechanism might also explain the ability of the claustrum to inhibit the  
168 cortex during slow-wave sleep<sup>13</sup>, where a low cholinergic tone would switch the  
169 discriminability of input towards the cortically-projecting claustral population. The  
170 ability to switch information between subpopulations might constitute a network  
171 mechanism to implement cholinergic control of attention<sup>5</sup>.

## 172 **Funding**

173 Supported by the Singapore Ministry of Education under its Singapore Ministry of  
174 Education Academic Research Fund Tier 3 (MOE2017-T3-1-002). A.N is supported by a  
175 National Science Scholarship awarded by the Agency of Science, Technology and  
176 Research, Singapore.



177 **Acknowledgments**

178 We thank K.L.L Wong, Z. Chia, G. X. Ham, L. Mark, and G. Silberberg for insightful  
179 discussions and comments on our paper and K. Chung, P. Teo, S. Kay, R. Tan, and Y.  
180 C. Teo for technical assistance.

181  
182 **References**

- 183 1. Hangya, B., Ranade, S.P., Lorenc, M. & Kepecs, A. *Cell* **162**, 1155–1168 (2015).  
184 2. Schmitz, T.W. & Duncan, J. *Trends Cogn. Sci.* **22**, 422–437 (2018).  
185 3. Thiele, A. & Bellgrove, M.A. *Neuron* **97**, 769–785 (2018).  
186 4. Mincses, V., Pinto, L., Dan, Y. & Chiba, A.A. *Proc. Natl. Acad. Sci.* **114**, 5725–5730  
187 (2017).  
188 5. van Kempen, J., Panzeri, S. & Thiele, A. *Trends Neurosci.* **40**, 522–524 (2017).  
189 6. Záborszky, L. et al. *J. Neurosci.* **38**, 9446–9458 (2018).  
190 7. Saunders, A., Granger, A.J. & Sabatini, B.L. *Elife* **4**, 1–13 (2015).  
191 8. Colangelo, C., Shichkova, P., Keller, D., Markram, H. & Ramaswamy, S. *Front. Neural*  
192 *Circuits* **13**, (2019).  
193 9. Takács, V.T. et al. *Nat. Commun.* **9**, 2848 (2018).  
194 10. Desikan, S., Koser, D.E., Neitz, A. & Monyer, H. *Proc. Natl. Acad. Sci.* **115**, E2644–  
195 E2652 (2018).  
196 11. Atlan, G. et al. *Curr. Biol.* **28**, 2752-2762.e7 (2018).  
197 12. Zingg, B., Dong, H.W., Tao, H.W. & Zhang, L.I. *J. Comp. Neurol.* **526**, 2428–2443 (2018).  
198 13. Narikiyo, K. et al. *Nat. Neurosci.* **23**, 741–753 (2020).  
199 14. White, M.G. et al. *Cell Rep.* **22**, 84–95 (2018).  
200 15. Zhao, S. et al. *Nat. Methods* **8**, 745–752 (2011).  
201 16. Graf, M., Nair, A., Wong, K.L.L., Tang, Y. & Augustine, G.J. *eneuro* **7**, ENEURO.0216-  
202 20.2020 (2020).  
203 17. Petreanu, L., Huber, D., Sobczyk, A. & Svoboda, K. *Nat. Neurosci.* **10**, 663–668 (2007).  
204 18. Kim, J., Matney, C.J., Roth, R.H. & Brown, S.P. *J. Neurosci.* **36**, 773–784 (2016).  
205 19. Chia, Z., Augustine, G.J. & Silberberg, G. *Curr. Biol.* **30**, 2777-2790.e4 (2020).  
206 20. Hammond, C. *Cell. Mol. Neurophysiol.* 173–197 (2015).doi:10.1016/B978-0-12-397032-  
207 9.00008-X  
208 21. Poorthuis, R.B., Enke, L. & Letzkus, J.J. *J. Physiol.* **592**, 4155–4164 (2014).

- 209 22. Batista-Brito, R. et al. *Neuron* **95**, 884-895.e9 (2017).
- 210 23. Yang, D., Günter, R., Qi, G., Radnikow, G. & Feldmeyer, D. *bioRxiv* (2019).
- 211 24. Silver, R.A. *Nat. Rev. Neurosci.* **11**, 474–489 (2010).
- 212 25. Disney, A.A., Aoki, C. & Hawken, M.J. *Neuron* **56**, 701–713 (2007).
- 213 26. Goard, M. & Dan, Y. *Nat. Neurosci.* **12**, 1444–1449 (2009).
- 214 27. Servan-Schreiber, D., Printz, H. & Cohen, J. *Science (80-. )*. **249**, 892–895 (1990).
- 215 28. Meir, I., Katz, Y. & Lampl, I. *J. Neurosci.* **38**, 10692–10708 (2018).
- 216 29. Sompolinsky, H., Yoon, H., Kang, K. & Shamir, M. *Phys. Rev. E* **64**, 051904 (2001).
- 217 30. Ruff, D.A. & Cohen, M.R. *Nat. Neurosci.* **17**, 1591–1597 (2014).
- 218 31. Hennequin, G., Vogels, T.P. & Gerstner, W. *Neuron* **82**, 1394–1406 (2014).
- 219 32. Gu, Y. et al. *Neuron* **71**, 750–761 (2011).
- 220 33. Stroud, J.P., Porter, M.A., Hennequin, G. & Vogels, T.P. *Nat. Neurosci.* **21**, 1774–1783  
221 (2018).
- 222 34. Hassani, O.K., Lee, M.G., Henny, P. & Jones, B.E. *J. Neurosci.* **29**, 11828–11840 (2009).
- 223 35. Lee, M.G. *J. Neurosci.* **25**, 4365–4369 (2005).
- 224 36. Graf, M., Nair, A., Wong, K.L., Tang, Y. & Augustine, G.J. *eNeuro* ENEURO.0216-  
225 20.2020 (2020).doi:10.1523/ENEURO.0216-20.2020
- 226 37. Kim, J., Matney, C.J., Roth, R.H. & Brown, S.P. *J. Neurosci.* **36**, 773–784 (2016).
- 227 38. Stroud, J.P., Porter, M.A., Hennequin, G. & Vogels, T.P. *Nat. Neurosci.* **21**, 1774–1783  
228 (2018).
- 229 39. Mincses, V., Pinto, L., Dan, Y. & Chiba, A.A. *Proc. Natl. Acad. Sci.* **114**, 5725–5730  
230 (2017).

231

232

233

234

235

236

237

238

239

240 **Figure Legends**

241 **Figure 1:** Cell-type specific direct cholinergic inputs in claustrum neurons. **a.** Direct  
242 excitatory inputs to claustrum neurons measured in the presence of Kynurenic Acid (KYN,  
243 1  $\mu$ M) and Gabazine (GBZ, 10  $\mu$ M) by photoactivating cholinergic terminals using 50ms  
244 light pulses at 488 nm. **b.** Distribution of excitation probability in all cell-types tested for  
245 direct excitation Cells held at -40 mV. **c.** A subset of neurons were tested for  
246 monosynaptic connectivity using Tetrodotoxin (TTX, 1  $\mu$ M) and 4- Aminopyridine (4-AP,  
247 500  $\mu$ M). **d.** CC neurons receive direct inhibition measured using KYNA, Atropine (ATR)  
248 and Mecamylamine (MECA). Monosynaptic connectivity is tested using TTX and 4-AP.  
249 **e.** Distribution of inhibition probability in all cell-types tested for direct inhibition.

250

251 **Figure 2:** Opposing gain control of claustrum cell-types. Left: Responses of claustrum  
252 neurons to 100 pA current injection during control and cholinergic photostimulation: 20ms  
253 pulses at 10 Hz for one second (**a:** Claustrrocortical, **b:** Claustrrosubcortical, **c:** Putative  
254 VIP interneurons). Right: Quantification of changes on input-current output-frequency (IO)  
255 curve in control and cholinergic photostimulation conditions. **d.** Quantification of changes  
256 on neuronal gain (\*\* $p < 0.01$ , \*\*\* $p < 0.005$ , Kruskal Wallis test with Dunn's post-hoc test for  
257 multiple comparison).

258

259 **Figure 3:** Incorporation of opposing gain control toggles signal-to-noise ratio and alters  
260 the correlation structure of model recurrent networks in a subpopulation specific manner.  
261 **a.** Paradigm used for signal-noise experiment: **a1:** Two inputs distributions ( $X_A$ ,  $X_B$ ) are  
262 transformed by empirical IO functions of CC (**a2**) to produce output distributions ( $Y_A$ ,  $Y_B$ ,  
263 **a3**). **a4.** Output distributions for CC neurons with IO functions with cholinergic

264 photostimulation ( $Y_{GA}$ ,  $Y_{GB}$ ). **b.** The same inputs (**b<sub>1</sub>**) are transformed by the empirical IO  
265 functions of CS neurons (**b<sub>2</sub>**) to produce output distributions for with native IO functions  
266 ( $Y_A$ ,  $Y_B$ , **b<sub>3</sub>**) compared to output distributions with IO functions with cholinergic  
267 photostimulation ( $Y_{GA}$ ,  $Y_{GB}$ , **b<sub>4</sub>**) **c:** Paradigm used for modelling experiment: A signal  
268 (Gaussian distributed;  $\mu = 200$  pA,  $\delta = 20$  pA) and noise (Poisson distributed;  $\mu = 100$  pA,  
269  $\delta = 100$  pA) are presented to an inhibition stabilized model of the claustrum. Right:  
270 Outputs of individual neurons (grey) and population average (black). **d.** Quantification of  
271 noise and signal correlations for CC neurons. (Linear fit, Ctrl:  $R^2 = 0.55$ , Cholinergic input:  
272  $R^2 = 0.40$ ) (**B<sub>2</sub>**). **e.** Quantification of noise and signal correlations for CS neurons. (Linear  
273 fit, Ctrl:  $R^2 = 0.50$ , Cholinergic input:  $R^2 = 0.57$ ). **f.** Cell-type specific cholinergic gain  
274 modulation leads to a toggle between cortical and sub-cortical projections in the  
275 claustrum.

276

## 277 **Supplementary Figure Legends**

278 **Supplementary Figure 1:** Current-Voltage relationship for direct cholinergic inputs. The  
279 amplitude of voltage clamp responses is measured for a range of holding potentials to  
280 determine the reversal potential of the response **a.** Current-Voltage plots for direct  
281 excitatory input for CC, CS and putative VIP neurons. Direct excitatory inputs are nicotinic  
282 receptor mediated as  $E_{rev}$  is closest to the reversal potential of the nicotinic receptor (0  
283 mV). **b.** Current-Voltage plots for direct inhibitory inputs reveals  $E_{rev}$  closest to the reversal  
284 potential of chloride in internal solution (-80 mV).

285

286 **Supplementary Figure 2:** Examining signal-to-noise ratio and encoding efficiency for a  
287 range of inputs. **a.** Effect of varying input size (**a<sub>1</sub>**) and input noise (**a<sub>2</sub>**) of distributions  $X_A$   
288 and  $X_B$  in Fig 3 on SNR for CS neurons. **b.** Effect of varying input size (**b<sub>1</sub>**) and input noise  
289 (**b<sub>2</sub>**) of distributions  $X_A$  and  $X_B$  on SNR for CC neurons. **c, d.** Dependence of correlations'  
290 slope on input size, i.e mean of Gaussian-signal and mean of Poisson-noise for CS  
291 neurons (**c**) and CC neurons (**d**). The grey dotted line shows that the toggle is dependent  
292 on signal-input size and takes place in an opposite direction above 140 pA.

293

294 **Supplementary Figure 3:** Optimization of inhibition stabilized claustrum model. The  
295 excitatory connectivity is specific by in-vitro experiments and previous findings<sup>18</sup> while  
296 inhibitory weights are modified by removing the unstable eigenvalues of the weight matrix  
297 **W** towards stability<sup>33</sup>. **a.** Optimization of the model by refining the spectral abscissa  
298 (largest real part of the eigenvalues in **W**) over multiple iterations. **b.** Network weight  
299 matrix **W** before and after optimization process for all 300 neurons.

300

## 301 **Methods**

### 302 **Animals**

303 All animal experiments were performed according to the Guidelines of the Institutional  
304 Animal Care and Use Committee of Nanyang Technological University, Singapore  
305 (Protocol number: 151075). 35 adult ChAT-Cre x floxed ChR2-YFP (B6;129S6-  
306 *Chat<sup>tm2(cre)Low</sup>* /J; # 006410) mice of both sexes were used to study cholinergic input to  
307 CLA cells. The average age of mice used in our experiments was postnatal day 65  $\pm$  0.6.

308

## 309 **Brain slice recording**

310 Acute brain slices were prepared according to the general procedures described in Graf  
311 et al. (2020). Mice were deeply anesthetized with isoflurane and euthanized via  
312 decapitation. The brains were isolated and transferred into ice-cold sucrose solution  
313 containing the following: 250 mM sucrose, 26 mM NaHCO<sub>3</sub>, 10 mM glucose, 4 mM MgCl<sub>2</sub>,  
314 3 mM myo-inositol, 2.5 mM KCl, 2 mM sodium pyruvate, 1.25 mM NaH<sub>2</sub>PO<sub>4</sub>, 0.5 mM  
315 ascorbic acid, 0.1 mM CaCl<sub>2</sub>, and 1 mM kynurenic acid, with an osmolality of 350–360  
316 mOsm and a pH of 7.4. Coronal brain slices (250 μm) were cut with a Leica VT 1000S  
317 vibratome. Slices were kept for 0.5 h at 34°C in artificial CSF (ACSF) containing the  
318 following: 126 mM NaCl, 24 mM NaHCO<sub>3</sub>, 1 mM NaH<sub>2</sub>PO<sub>4</sub>, 2.5 mM KCl, 2 mM CaCl<sub>2</sub>, 2  
319 mM MgCl<sub>2</sub>, 10 mM glucose, and 0.4 mM ascorbic acid; 300–310 mOsm, pH 7.4, and  
320 gassed with a 95% O<sub>2</sub>/5% CO<sub>2</sub> mixture before transfer to ACSF at room temperature for  
321 recordings.

322

323 Whole-cell patch clamp recordings were performed using Borosilicate glass pipettes (5-9  
324 MΩ) filled with internal solution containing the following: 130 mM K-gluconate, 10  
325 mM KOH, 2.5 mM MgCl<sub>2</sub>, 10 mM HEPES, 4 mM Na<sub>2</sub>ATP, 0.4 mM Na<sub>3</sub>GTP, 5 mM EGTA,  
326 5 mM Na<sub>2</sub> phosphocreatinin, and 0.2% neurobiotin (290–295 mOsm, pH 7.4).  
327 Recordings were performed at 24°C with a MultiClamp 700B amplifier (Molecular  
328 Devices) and a Digidata 1440 interface (Molecular Devices). Signals were acquired at 50  
329 kHz and filtered at 10 kHz. Access resistance ( $R_a$ ) was measured and only cells with  $R_a$   
330 < 30 MΩ were used for further analysis. Cell-type identity was determined using an  
331 automated classifier using electrical properties described in Graf et al., 2020. Fourteen

332 electrophysiological properties described in Graf et al., 2020 are extracted using software  
333 made available by the authors at <https://github.com/adityanairneuro/claustrom>. A trained  
334 classifier is used to distinguish between the two subtypes of claustral projection neurons  
335 and three subtypes of claustral interneurons.

336

337 For optogenetic photoactivation of cholinergic terminals, slices were illuminated by a  
338 130W short arc mercury lamp (Olympus) passed through an EYFP filter set and a x25  
339 water-immersion objective. For voltage clamp experiments, we delivered 50 ms light  
340 pulses while clamping neurons at -40 mV. For current clamp experiments, we delivered  
341 blue light at 10Hz in 20 ms light pulses for a duration of one second. We choose this  
342 stimulation protocol to mimic average firing rates of basal forebrain cholinergic neurons  
343 which range from 7-14 Hz during wakefulness and REM sleep<sup>34,35</sup>.

344

### 345 **Analysis of neuronal gain**

346 In current clamp experiments, we constructed input-output (IO) curves for each neuron  
347 by injecting depolarizing current pulses in the range 0-400 pA in 20 pA steps and  
348 measuring output firing frequency. Empirically determined input current-output frequency  
349 curves were fit with sigmoidal tanh functions of the form:

350

$$351 \quad y = (r_{max} - r_0) \times \tanh(g_k x_i / (r_{max} - r_0)) \quad (1)$$

352

353 Where  $r_{max}$  is the maximum observed firing frequency,  $r_0$  is the baseline firing frequency,  
354  $x$  is the input current and  $g_k$  is the gain or slope of the function at baseline and thus  
355 represents the input-output sensitivity of the neuron  $k$ .

356

### 357 **Analysis of signal-to-noise ratio with simulations using empirical IO functions**

358 Given that cholinergic input can alter gain, we analyzed whether these empirically  
359 observed differences in IO curves of CC and CS neurons might be sufficient for these  
360 projections to process input differently. We modelled this possibility by considering how  
361 two input probability distribution functions (PDF:  $X_A$ ,  $X_B$ ) would be transformed by IO  
362 functions of neurons with and without cholinergic photostimulation (Fig 3a). To quantify  
363 the amount of separation between output PDFs, we compared the change in the ratio of  
364 their means with and without cholinergic gain control as this reflects the SNR of the two  
365 signals  $X_A$  and  $X_B$ <sup>27</sup>. Formally:

366

$$367 \quad \Delta SNR = \left\{ \frac{\mu(Y_{GB})}{\mu(Y_{GA})} - \frac{\mu(Y_B)}{\mu(Y_A)} \right\} / \frac{\mu(Y_B)}{\mu(Y_A)} \quad (2)$$

368 Where  $Y_{GB}$  and  $Y_{GA}$  are output PDFs in the presence of cholinergic gain control whereas  
369  $Y_B$  and  $Y_A$  are outputs PDFs in its absence.  $\mu(Y)$  indicates the mean of distribution  $Y$ .

370

371 We verified that the SNR results we observed generalized for a range of input (PDF:  $X_A$ ,  
372  $X_B$ ) means and SDs by systematically varying either the mean of  $X_A$ ,  $X_B$  (Fig S2a<sub>1</sub>, S2b<sub>1</sub>)  
373 or the SD of  $X_A$ ,  $X_B$  (Fig S2a<sub>2</sub>, S2b<sub>2</sub>).

374

375



## 376 **Analysis of signal and noise correlations in model CLA-like networks**

377 To understand the role of cholinergic gain control in CLA-like networks, we constructed a  
378 recurrently connected network model using stability optimised circuits (SOCs), a class of  
379 networks where inhibition stabilises the network to create a non-chaotic network with  
380 transient dynamics. Below we briefly describe this model.

381

382 We first generate synaptic weight matrices  $W$  with  $N = 300$  neurons (with excitatory and  
383 inhibitory neurons in the ratio 9:1 as empirically determined<sup>36</sup>) as detailed in Hennequin  
384 et al., 2014<sup>31</sup>.

385

386 We begin with set of sparse weights with non-zero elements set to  $w_o/\sqrt{N}$  for excitatory  
387 neurons and  $-\gamma w_o/\sqrt{N}$  for inhibitory neurons, where  $w_o^2 = 2\rho^2/(p(1-p)(1+\gamma^2))$  with  
388 connection probability  $p$  being 0.03 for excitatory neurons and 0.4 for interneurons as  
389 empirically determined<sup>37</sup>. We construct  $W$  with an approximately circular spectrum (i.e  
390 set of eigenvalues) of radius  $\rho = 10$  and inhibition/excitation ratio  $\gamma = 3$  in line with  
391 Hennequin et al., 2014 (Fig S3b, Left).

392

393 Following construction of  $W$ , we never change the excitatory weight, but refine the  
394 inhibitory connections to minimize the ‘spectral abscissa’ of  $W$ , which is the largest real  
395 part among the eigenvalues of  $W$  (Fig S3a). This optimization is performed according to  
396 Stroud et al., 2018 and the resulting matrix, referred to as a stability optimized circuit or  
397 SOC is non-chaotic<sup>38</sup> (Fig S3b, Right).

398

399 The use of SOCs is an approximation used due to the lack of precise cell-type specific  
400 connectivity for the CLA. SOCs have been used to study the effect of gain modulation in  
401 motor cortex circuits<sup>38</sup>. Since we were interested in gain control of the CLA network, we  
402 used SOCs to obtain a non-chaotic network with CLA-like connectivity for PN-PN and IN-  
403 IN connections and empirically determined IO curves for each cell type.

404

405 Our model is governed by a differential equation which controls neuronal activity  
406 (Equation 3) using the gain function (Equation 1) and the synaptic connectivity matrix  $W$ .

407

$$408 \quad \tau \frac{dx(t)}{dt} = -\mathbf{x}(t) + \mathbf{W} f(x(t); g) + I \quad (3)$$

409

410 We integrate Equation 1 using the ODE45 function in Matlab using default parameters.

411

412 The initial condition  $x_0$  was chosen among the “most observable” modes which elicit the  
413 strongest transient dynamics according to Hennequin et al., 2014<sup>31</sup>.

414

415 To mimic in-vivo experiments which examined the effect of cholinergic input on signal and  
416 noise correlations in networks<sup>39</sup>, we delivered time varying inputs  $I$  as shown in Fig 3 C.

417 We delivered two sets of inputs, a signal which consists of gaussian distributed input  
418 where the SD of input is 1/10<sup>th</sup> of its mean. In a different set of trials, we provided a second

419 noisy input to the network which was Poisson distributed with SD equal to the mean of  
420 the signal. Signal correlation – Noise correlation graphs are obtained by plotting the

421 Pearson's correlations coefficient (PCC) between every pair of excitatory neurons during  
422 the presentation of the Gaussian signal vs during the presentation of Poisson noise.

423

424 To ensure that the results we observed were robust for a range of input sizes, we  
425 systematically varied the mean of either the Gaussian signal or Poisson noise and  
426 examined the slope of the signal-noise correlation plot (Fig S2 c, S2d).

427

428 Code used for analysis of IO curves and the recurrent claustrum network is available at  
429 <https://github.com/adityanairneuro/cholinergic>

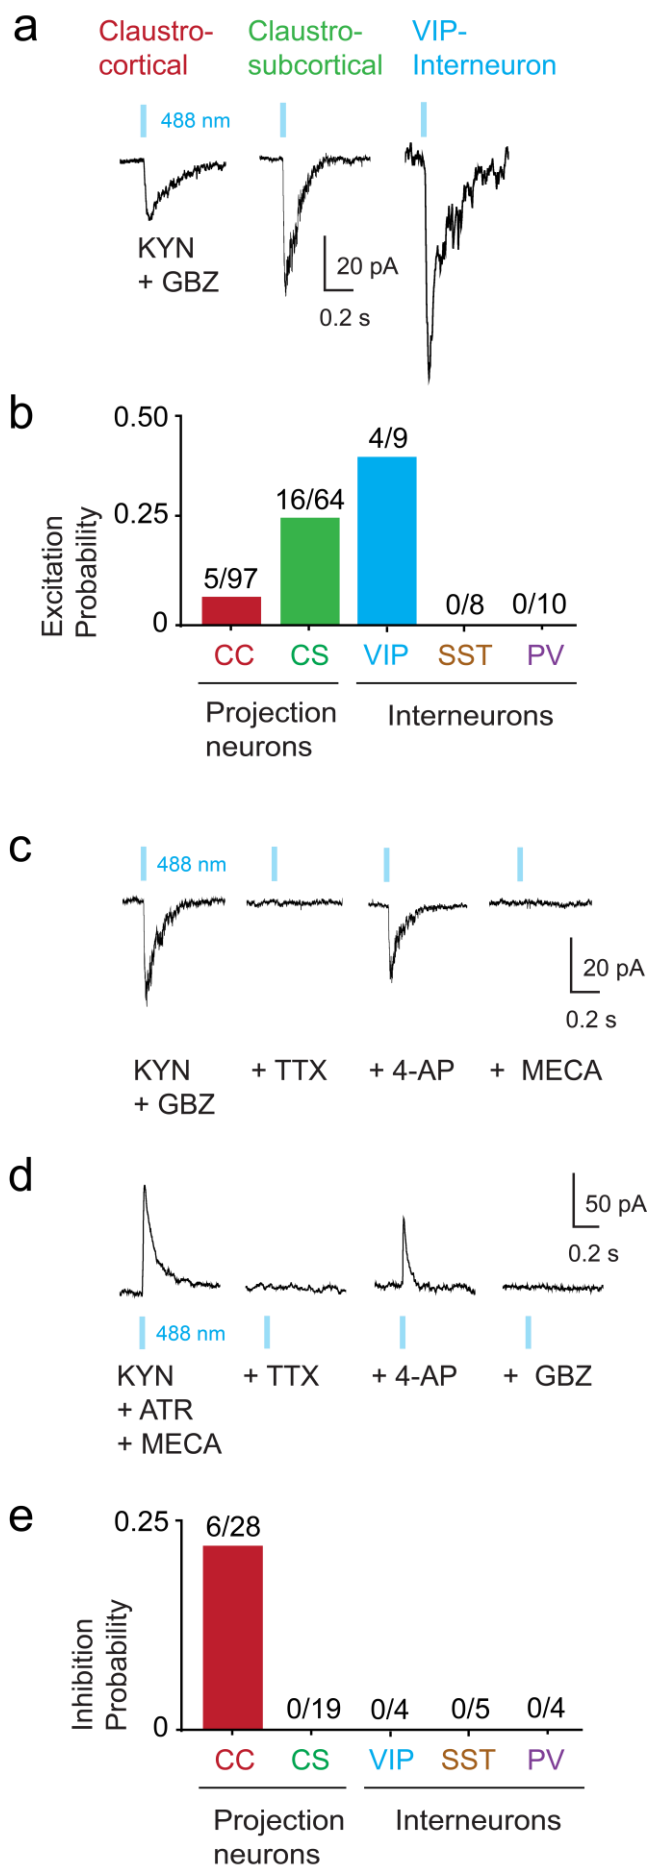

**a** Claustrocortical

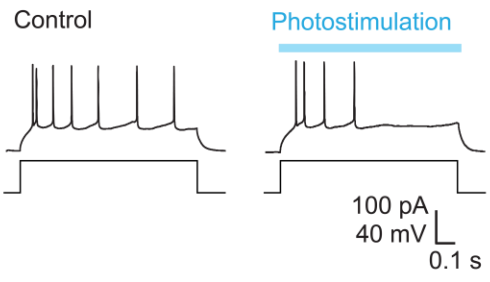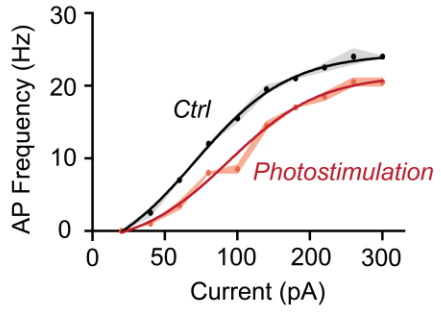

**b** Claustrosubcortical

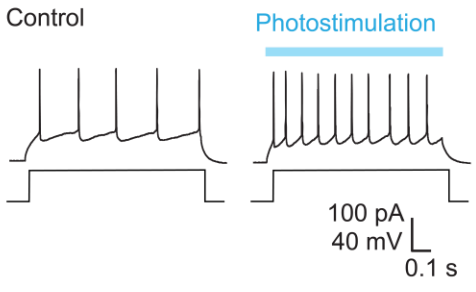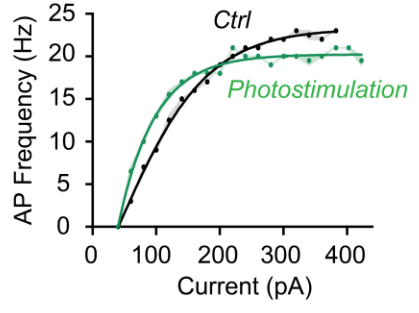

**c** VIP Interneuron

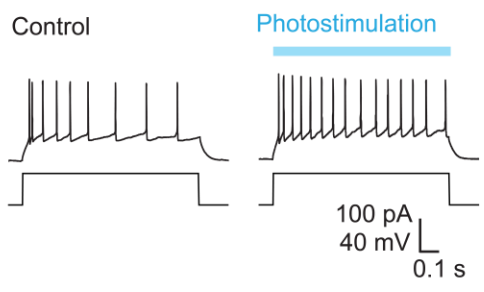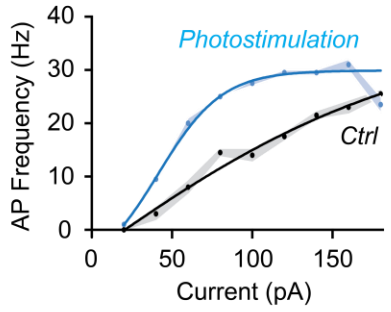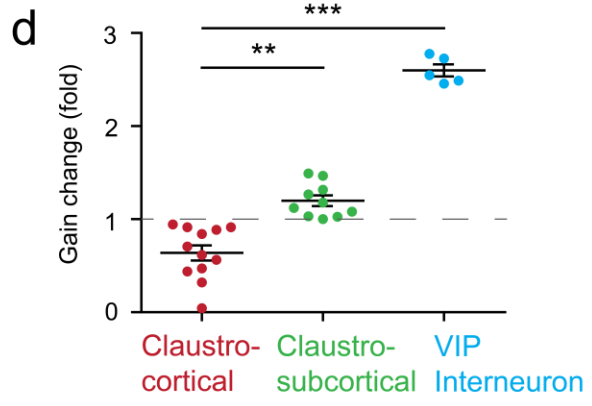

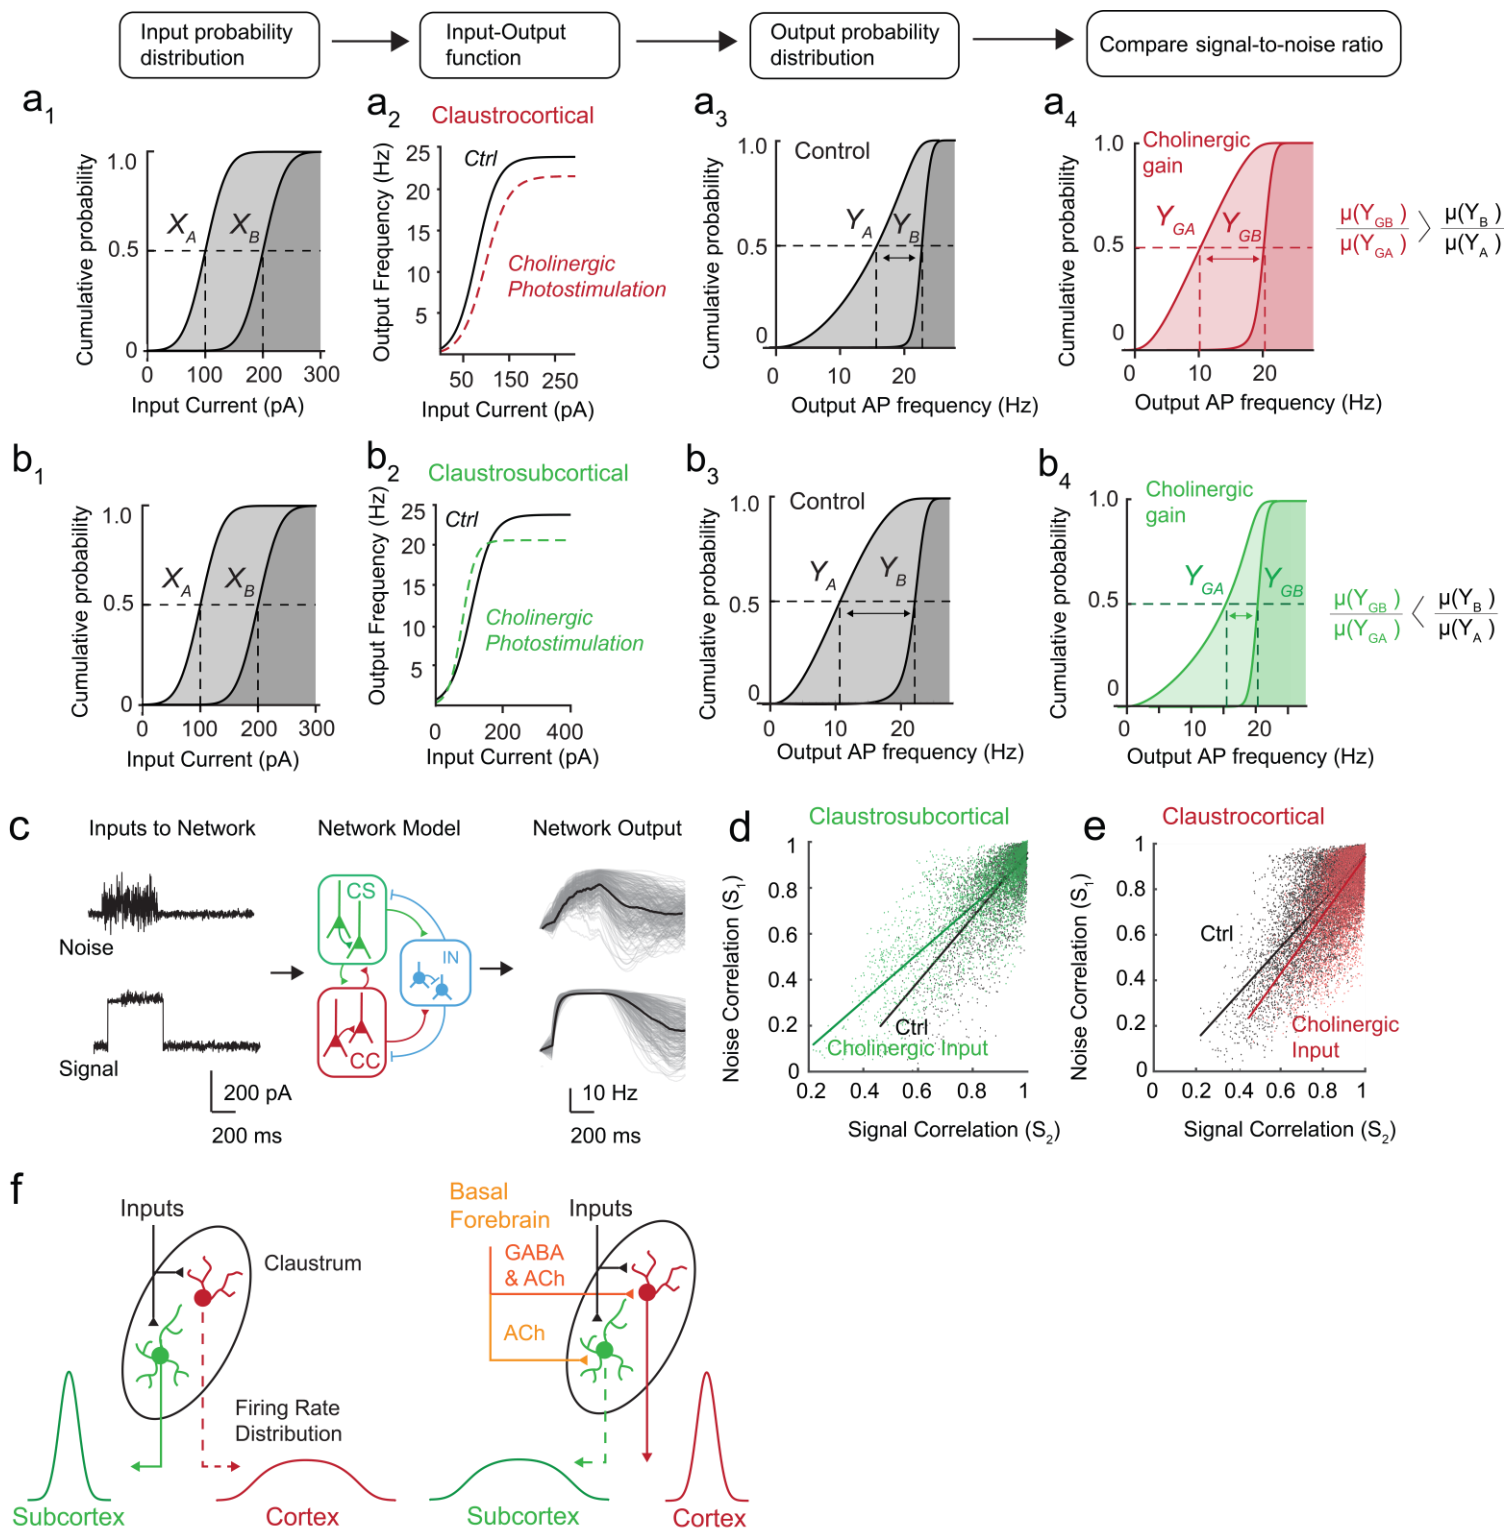

a

Current-Voltage plots for direct excitatory responses

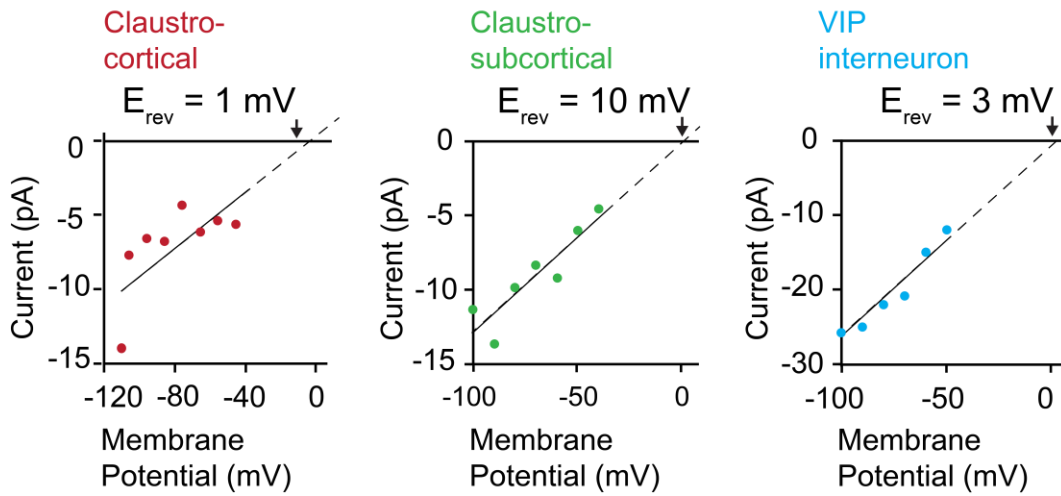

b

Current-Voltage plots for direct inhibitory responses

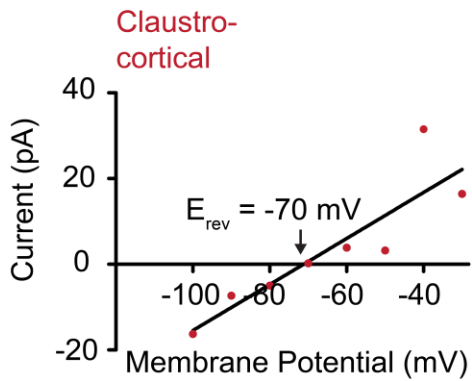

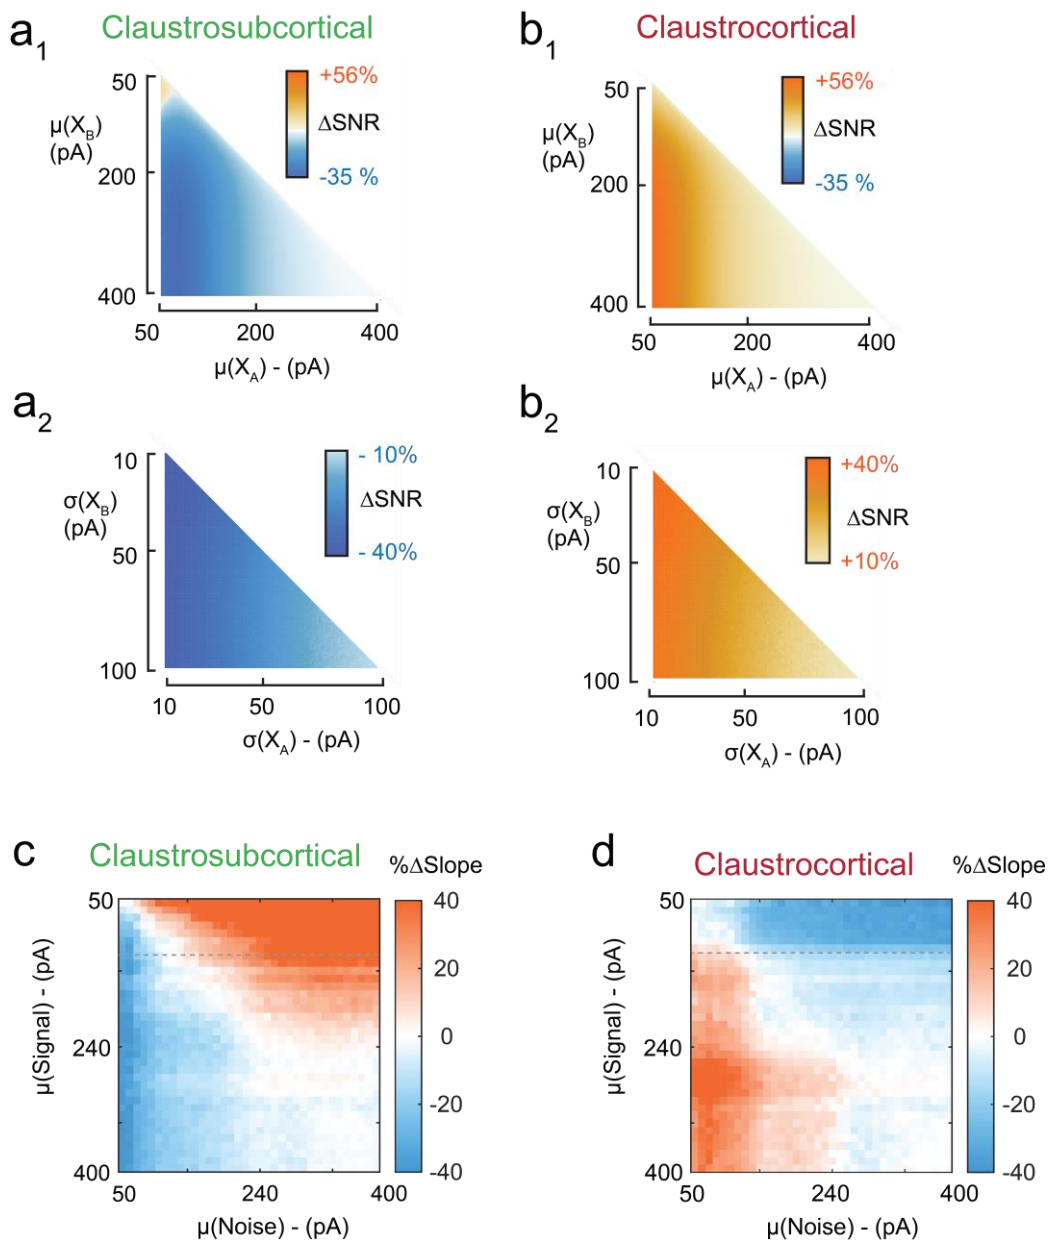



**a** Convergence of optimization

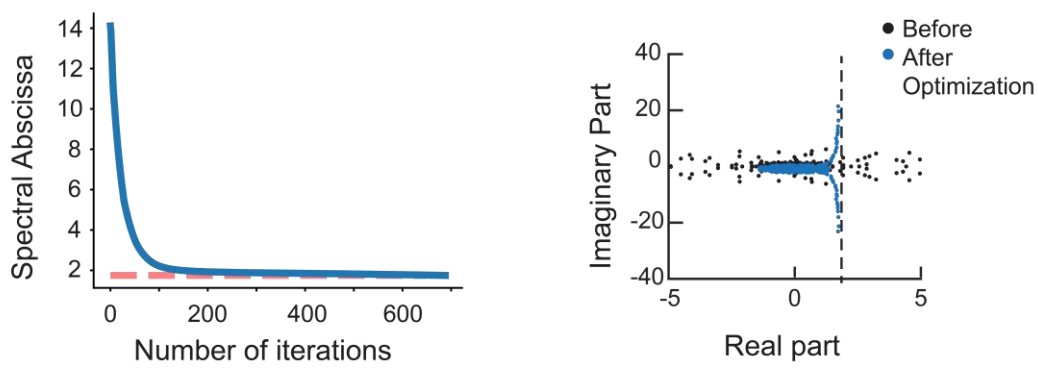

**b** Network weight matrix before and after optimization

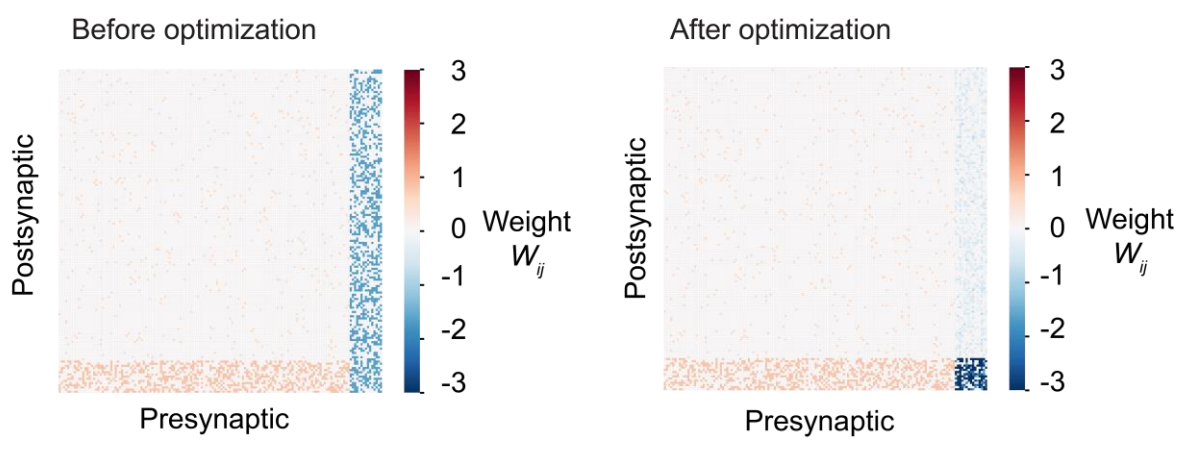

Source: https://www.biorxiv.org/content/10.1101/2021.02.25.432623v1.full.pdf
